# Supplementary material for: Cell-Extrinsic Differentiation Block Mediated by EphA3 in Pre-Leukaemic Thymus Contributes to Disease Progression
Source: MDPI journal article supplement (doi:10.3390/cancers13153858), 2021-07-31
Supplement: s1 [file s1]

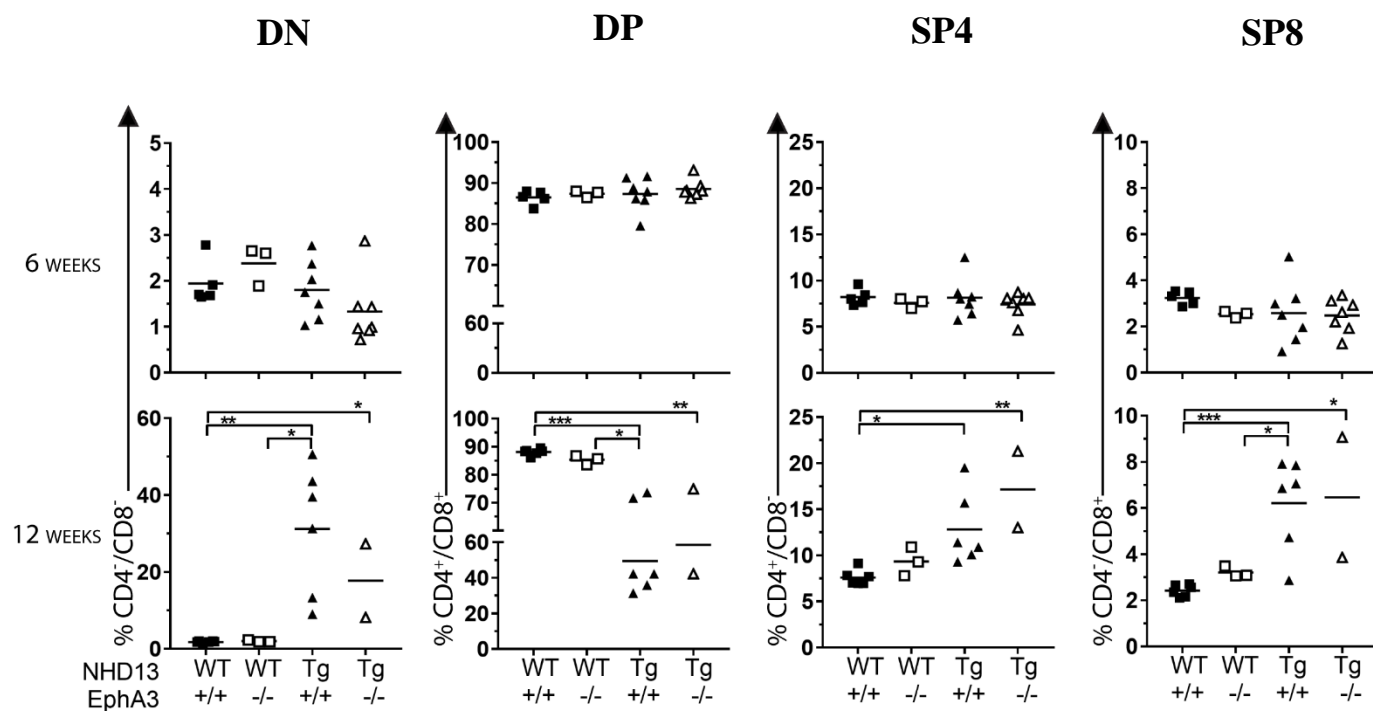

**Figure S1. Quantitation of Double Negative (DN), Double Positive (DP), Single Positive CD4<sup>+</sup> (SP4) and Single Positive CD8<sup>+</sup> (SP8) populations**

Quantitation of DN (CD4<sup>-</sup>/CD8<sup>-</sup>), DP (CD4<sup>+</sup>/CD8<sup>+</sup>), SP4 (CD4<sup>+</sup>/CD8<sup>-</sup>) and SP8 (CD4<sup>-</sup>/CD8<sup>+</sup>) in 6 and 12 week old mice of each indicated genotype. Data represent the mean and points represent individual mice 3-8 per group. *P-values* were calculated using Student's T-test (\* $<0.05$ , \*\* $<0.005$ , \*\*\* $<0.0005$ ).

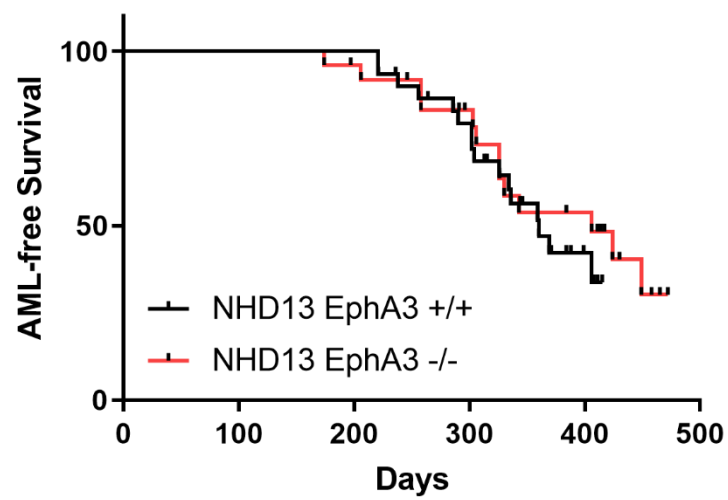

**Figure S2. EphA3 deletion does not impact the incidence of AML in the NHD13 mice.** Kaplan-Meier plot of T-ALL-free survival for each indicated genotype, with deaths due to causes other than AML censored.

### DN1

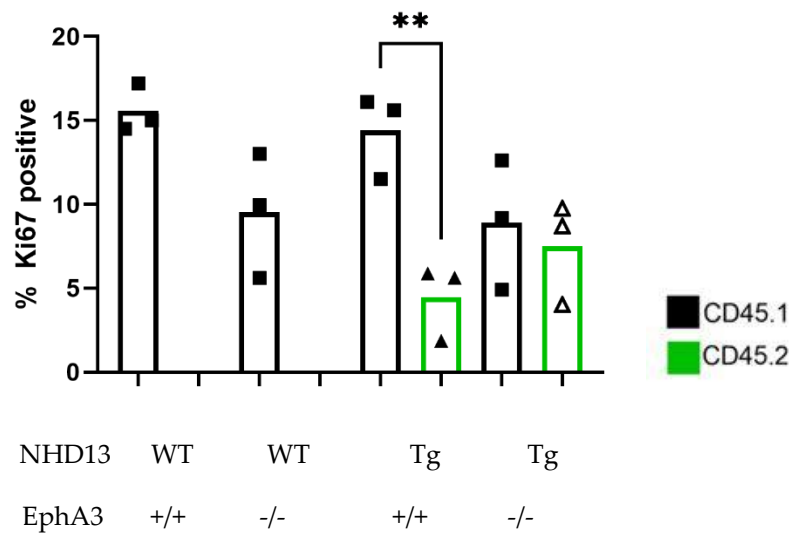

### DN3

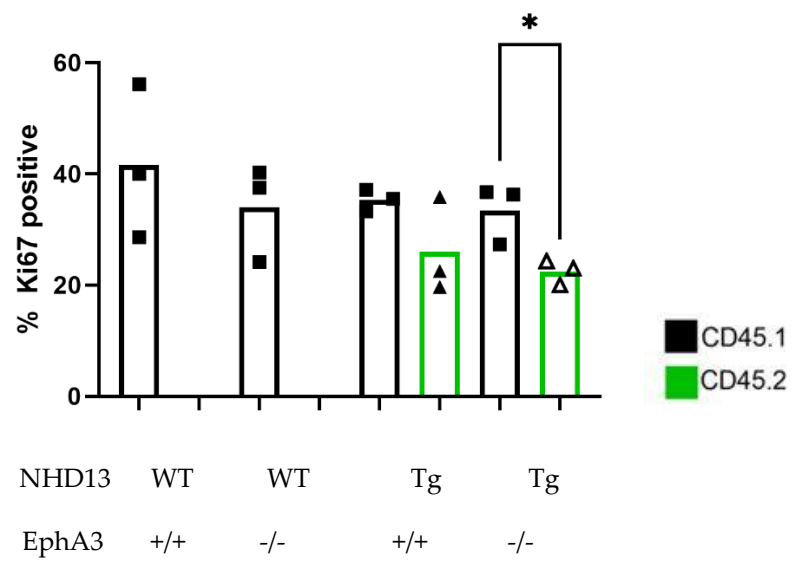

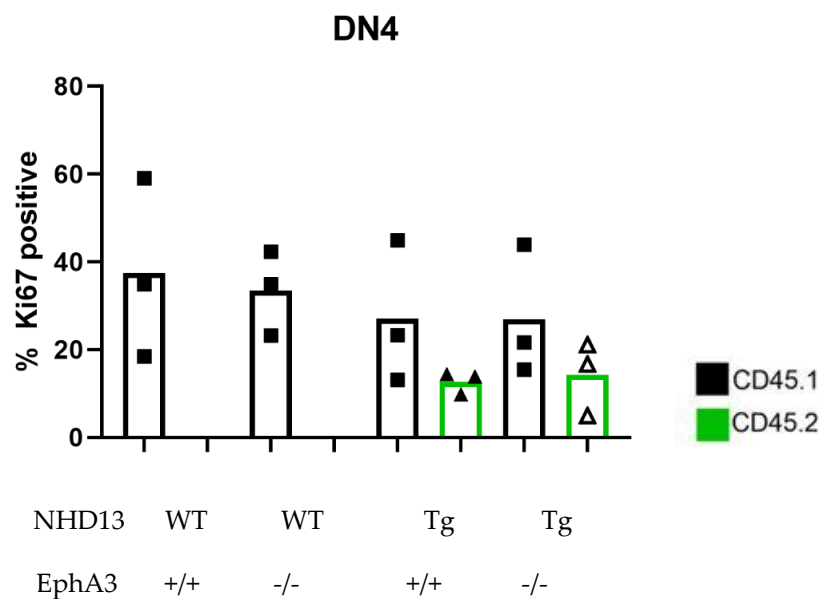

**Figure S3. EphA3 deletion does not impact the cell cycle of wild type recipient cells in DN1, DN3 or DN4.** Cell division analysis of DN1, DN3 and DN4 thymocytes in the primary transplant recipient. Recipient (CD45.1) or donor (CD45.2) thymocytes were analysed for cell division/ quiescent status using Ki67 and DNA (Hoechst) stains. Bars represent the mean, points represent individual mice, n = 3.
